# Supplementary material for: Parasitoid biology preserved in mineralized fossils
Source: PubMed Central journal article supplement (PMC6113268; doi:10.1038/s41467-018-05654-y), 2018-08-28
Supplement: 41467_2018_5654_MOESM1_ESM.pdf [file 41467_2018_5654_MOESM1_ESM.pdf]

## Supplementary Information

### Parasitoid biology preserved in mineralized fossils

van de Kamp *et al.*

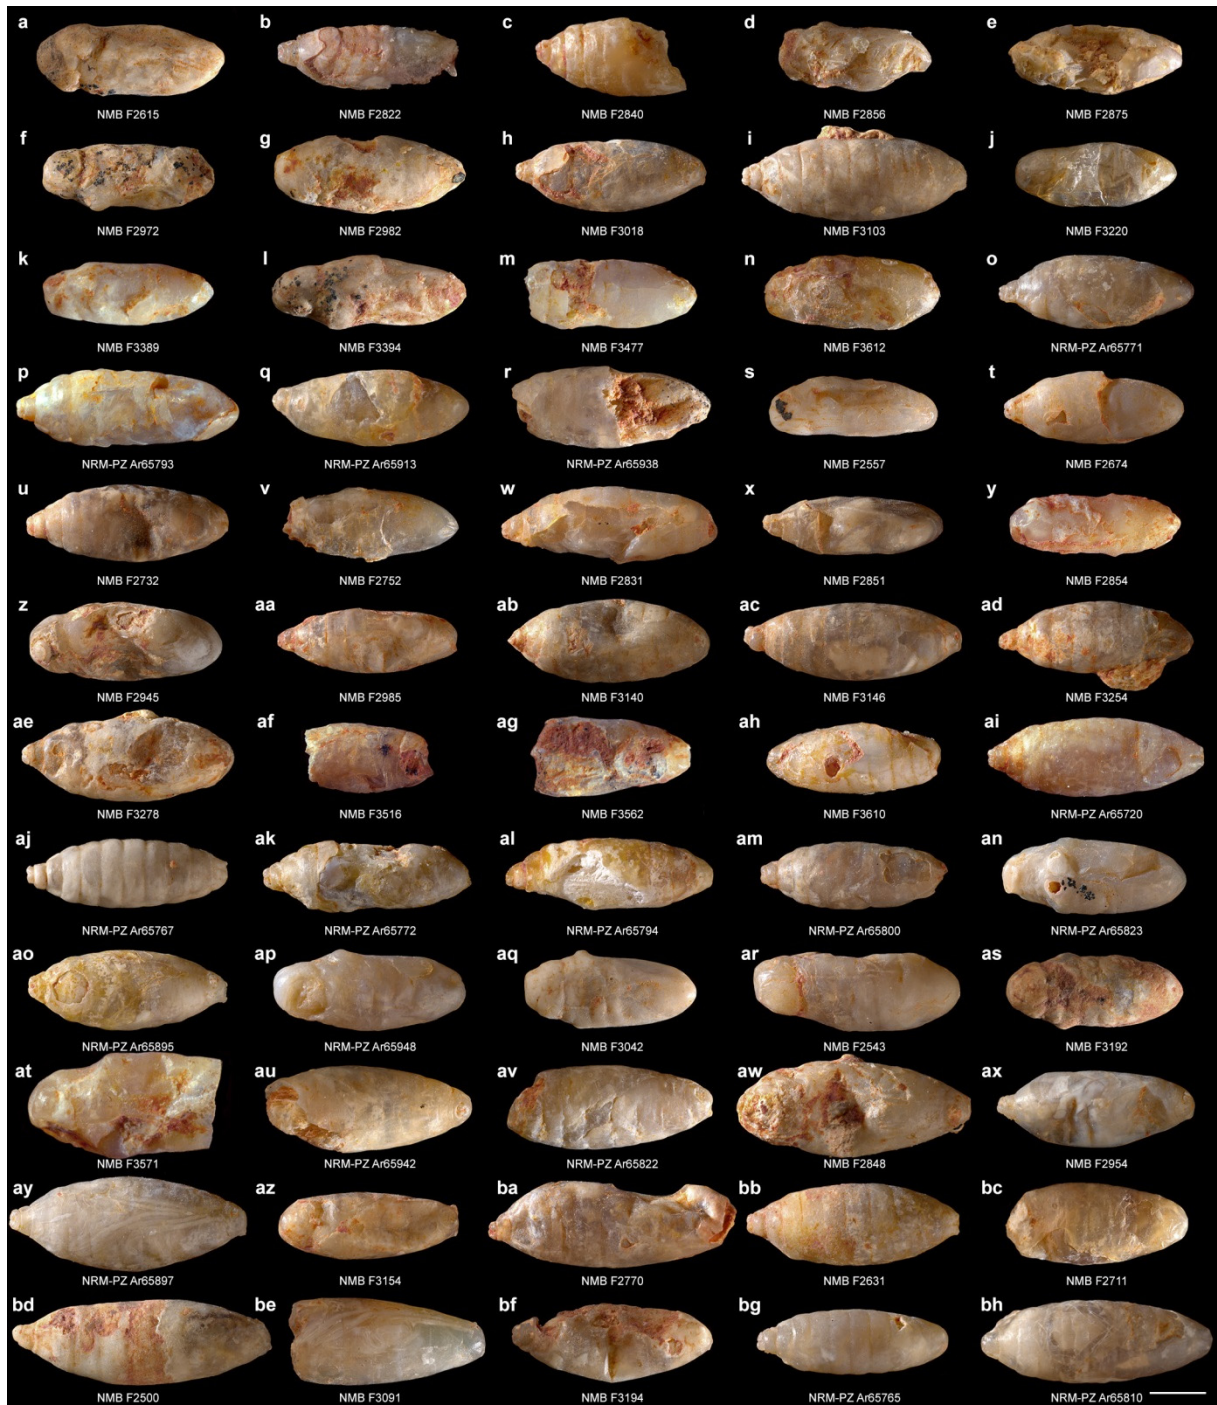

**Supplementary Figure 1 | Photographs of the fossils, in which the following parasitization events or host remains were identified: a-r: *Xenomorphia resurrecta* females; s-ap: *X. resurrecta* males; aq: *X. handschini* female; ar-au: *X. handschini* males; av: *X. handschini* pupa of unknown sex; aw-ay: *Coptera anka* females; az: *C. anka* male; ba: *Palaeortona quercyensis* female; bb: unidentified putative second instar larva; bc: last-instar larval mandibles left-behind by an emerged parasitoid; bd-bh: preserved parts of the host flies. Scale bar: 1 mm.**

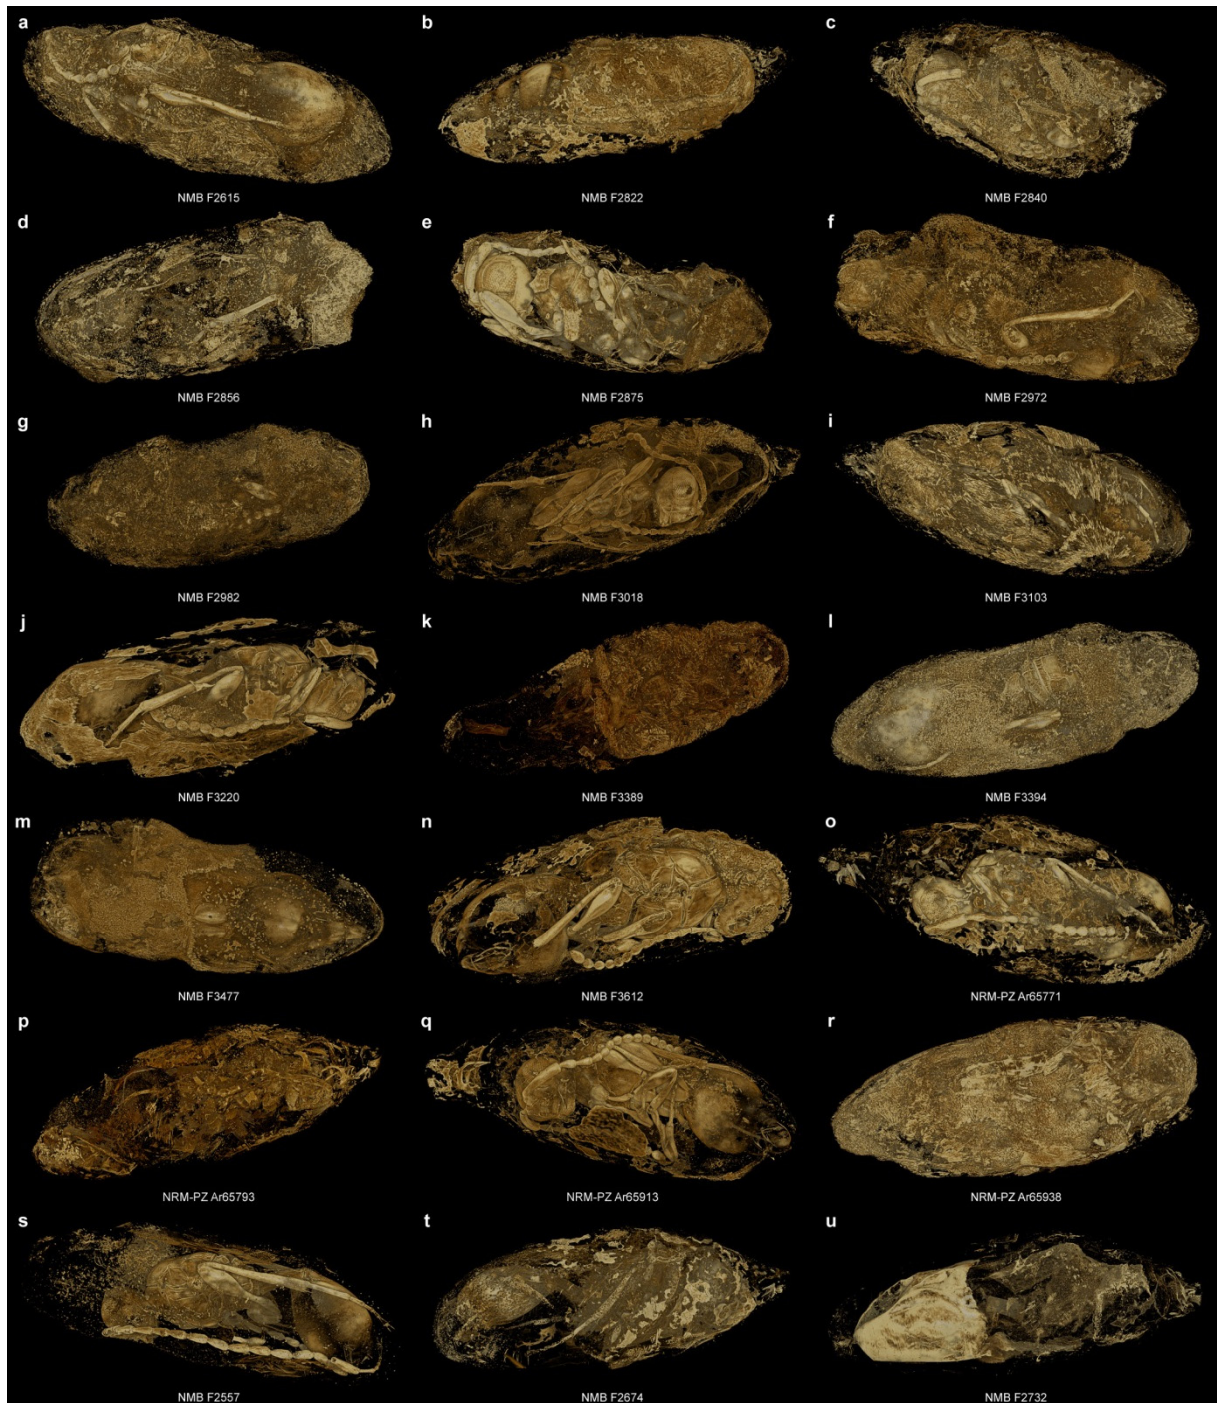

**Supplementary Figure 2 | Volume renderings of the inside of *Eophora* pupae, in which parasitism events were identified (perspective view). a-r: *Xenomorphia resurrecta* females; s-u: *X. resurrecta* males. See Supplementary Fig. 1 for external shape of the puparia and scale bar.**

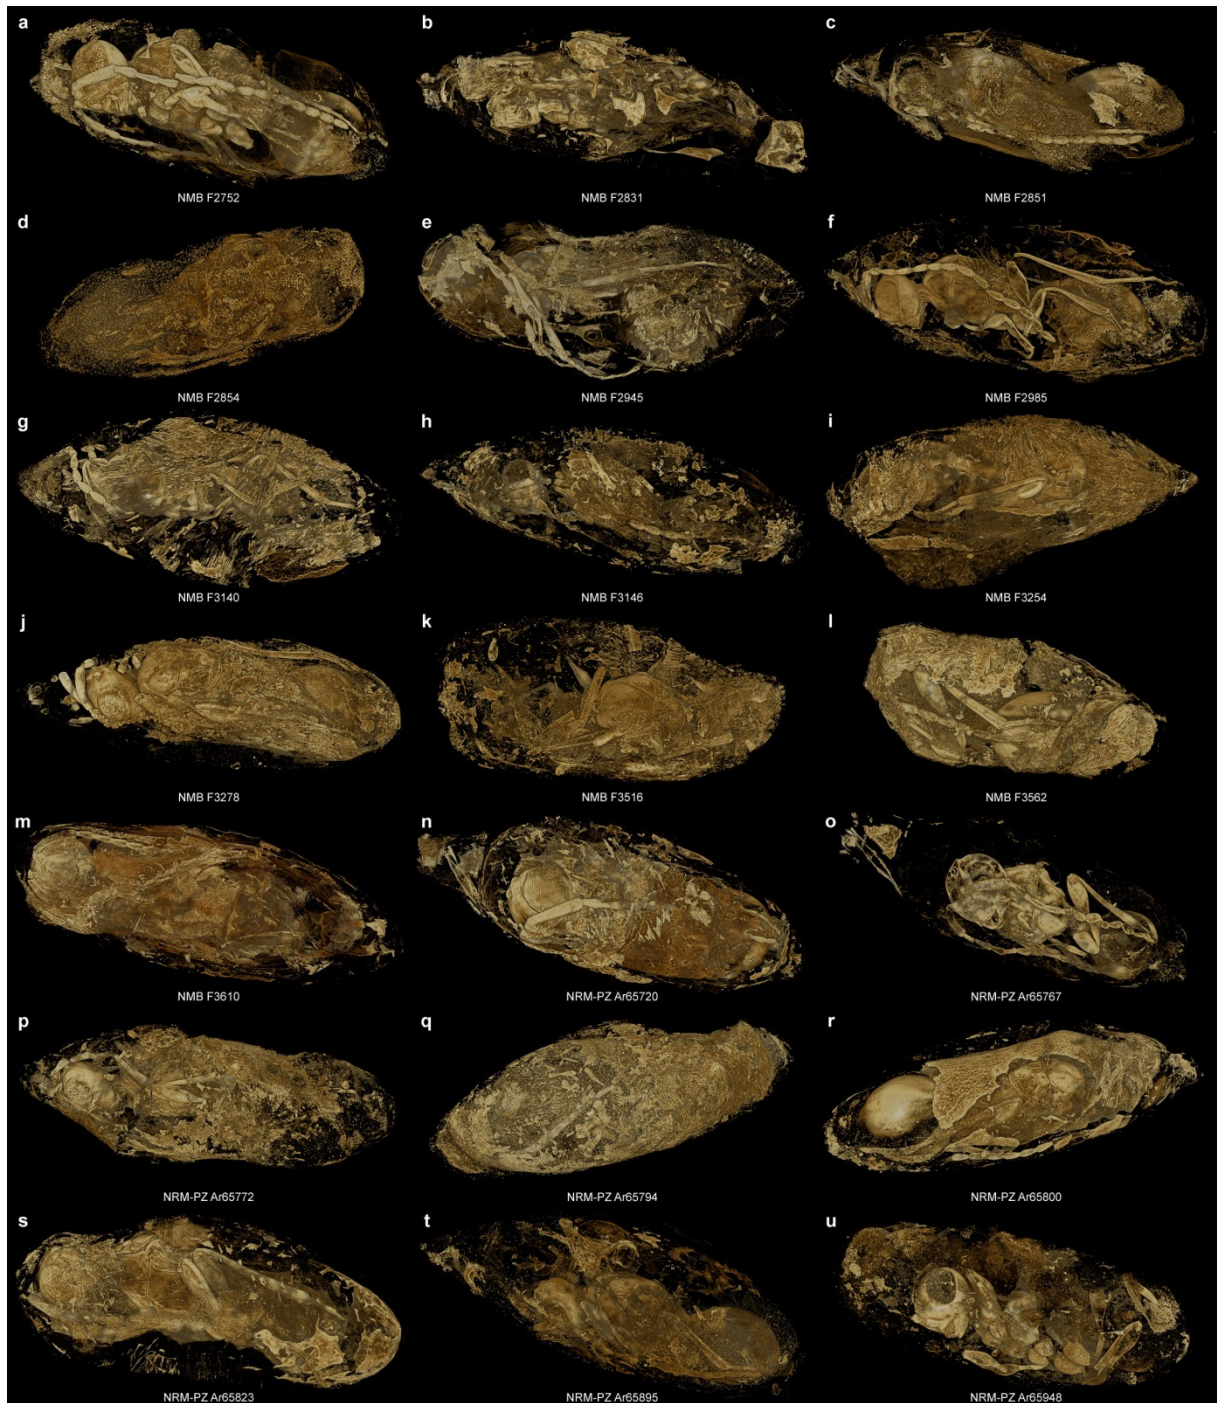

**Supplementary Figure 3 | Volume renderings of the inside of *Ephora* pupae, in which parasitization events were identified (*Xenomorphia resurrecta* males; perspective view).** See Supplementary Fig. 1 for external shape of the puparia and scale bar.

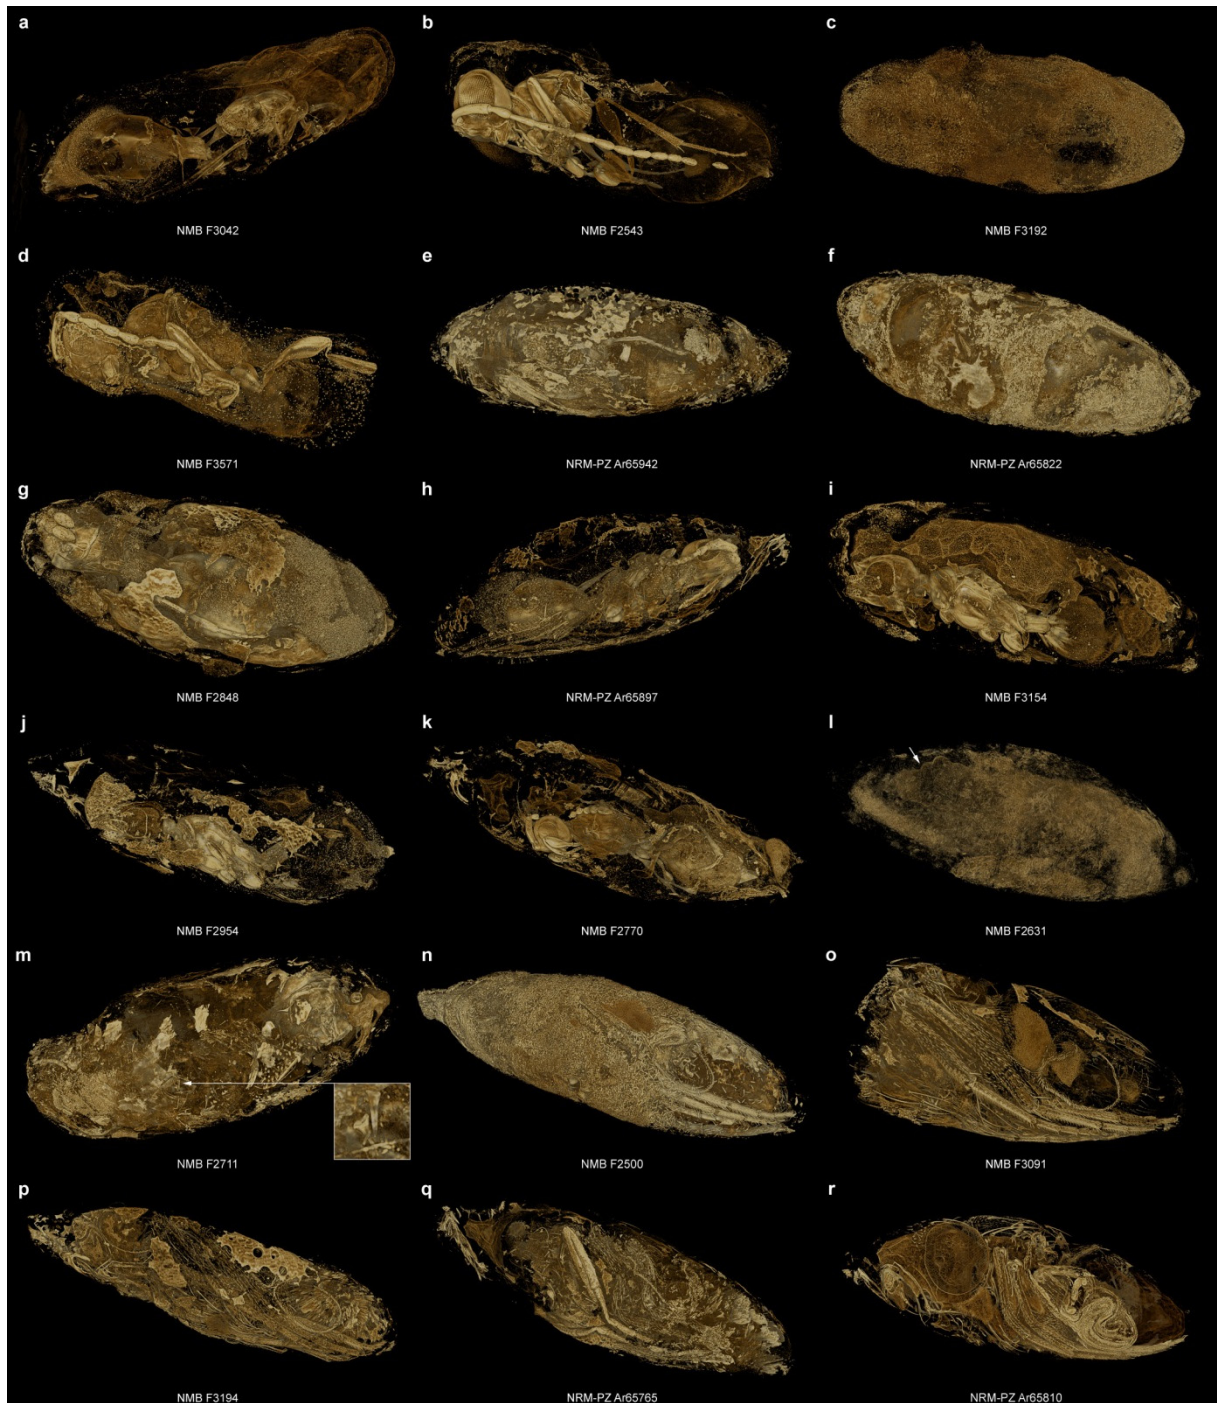

**Supplementary Figure 4 | Volume renderings (perspective view) of the inside of *Eophora* pupae, in which parasitisation events or host remains were identified (perspective view). a: *Xenomorphia handschini* female; b-e: *X. handschini* males; f: *X. handschini* pupa of unknown sex; g-i: *C. anka* females; note the preserved fly host legs in (h); j: *C. anka* male; k: *Palaeortona quercyensis* female; l: unidentified putative second instar larva (arrow); m: last-instar larval mandibles left-behind by an emerged parasitoid (see inset); n-r: preserved parts of the host flies. See Supplementary Fig. 1 for external shape of the puparia and scale bar.**

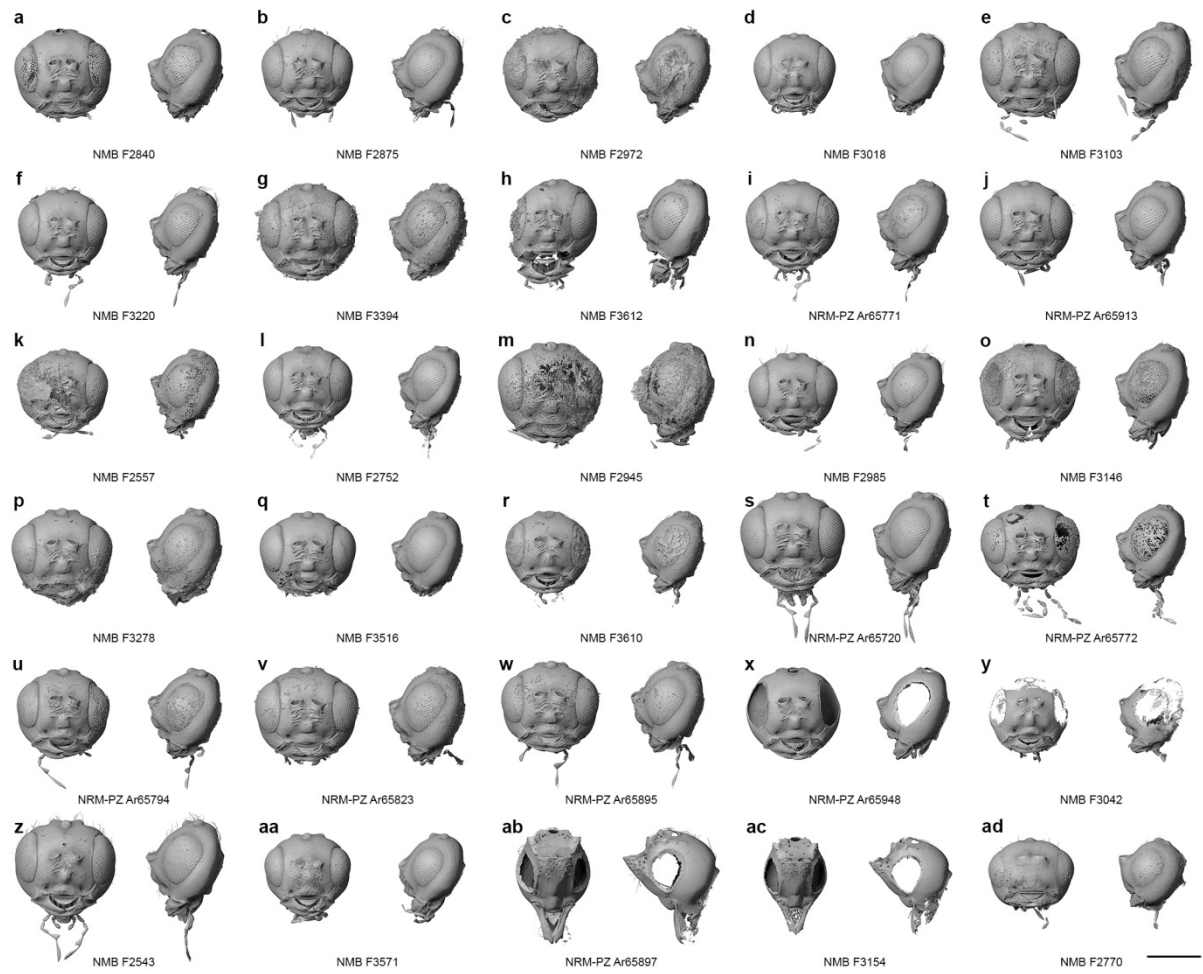

**Supplementary Figure 5 | Surface renderings of 30 parasitoid heads. a-j: *Xenomorphia resurrecta* females; k-x: *X. resurrecta* males; y: *X. handschini* female; z,aa: *X. handschini* males; ab: *Coptera anka* female; ac: *C. anka* male; ad: *Palaeortona quercyensis* female. Scale bar: 250  $\mu$ m.**

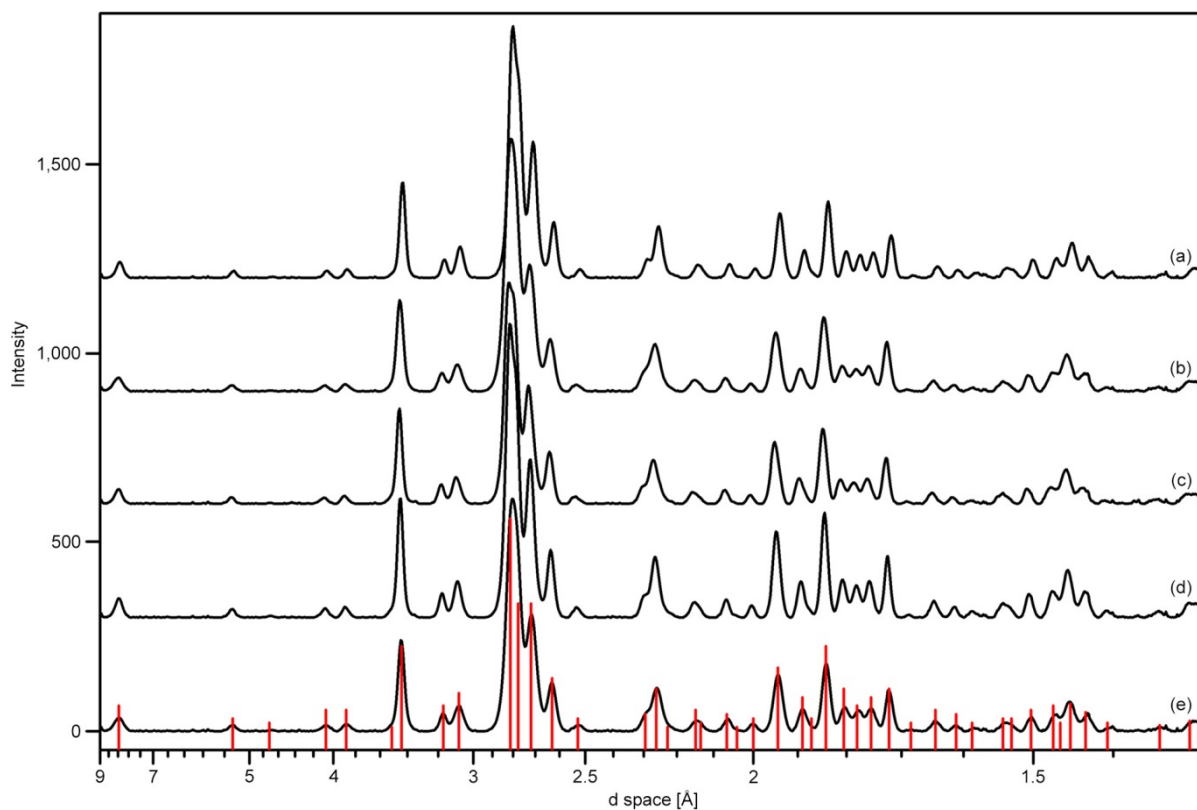

**Supplementary Figure 6 | Synchrotron X-ray diffraction pattern of five pupae.** NMB F2459 (a), NMB F2460 (b), NMB F2531 (c), NMB F2557 (d) & NMB F2915 (e). All samples consist of the mineral apatite (general formula  $\text{Ca}_5(\text{PO}_4)_3(\text{OH},\text{F},\text{Cl})$ ), indicated by a line pattern from the ICDD database (entry PDF 9-432).

**Supplementary Table 1 | List of identified parasitiation events**

| collection no. | species              | sex    | stage | posture    | wings         | reference length (µm) | external preservation of the host                                              | preservation of the parasitoid                                                                                                                           |
|----------------|----------------------|--------|-------|------------|---------------|-----------------------|--------------------------------------------------------------------------------|----------------------------------------------------------------------------------------------------------------------------------------------------------|
| NMB F2615      | <i>X. resurrecta</i> | female | adult | asymmetric | unfolded      | 911                   | pupal skin only                                                                | generally well-preserved; mesosoma damaged dorsally                                                                                                      |
| NMB F2822      | <i>X. resurrecta</i> | female | adult | symmetric  | folded        | 785                   | puparium largely detached from pupal skin                                      | generally well-preserved; head hollow                                                                                                                    |
| NMB F2840      | <i>X. resurrecta</i> | female | adult | symmetric  | folded        | 826                   | posterior half of puparium missing                                             | generally well-preserved and hollow; posterior part of gaster missing                                                                                    |
| NMB F2856      | <i>X. resurrecta</i> | female | adult | asymmetric | unfolded      | 790                   | pupal skin only; antenna shines through                                        | generally poorly preserved; head damaged                                                                                                                 |
| NMB F2875      | <i>X. resurrecta</i> | female | adult | asymmetric | unfolded      | 824                   | pupal skin only                                                                | well-preserved; remnants of flight muscles visible                                                                                                       |
| NMB F2972      | <i>X. resurrecta</i> | female | adult | symmetric  | unfolded      | 890                   | pupal skin only                                                                | generally well-preserved; head and legs partly damaged                                                                                                   |
| NMB F2982      | <i>X. resurrecta</i> | female | adult | asymmetric | unfolded      | 851                   | puparium largely detached from pupal skin                                      | generally poorly preserved and partly connected to adjacent voids; head capsule damaged                                                                  |
| NMB F3018      | <i>X. resurrecta</i> | female | adult | asymmetric | unfolded      | 765                   | complete puparium; slightly damaged                                            | well-preserved; antennae and legs largely hollow                                                                                                         |
| NMB F3103      | <i>X. resurrecta</i> | female | adult | asymmetric | unfolded      | 941                   | complete puparium; small piece of stony matrix attached                        | generally well-preserved; head capsule hollow                                                                                                            |
| NMB F3220      | <i>X. resurrecta</i> | female | adult | symmetric  | folded        | 772                   | pupal skin only                                                                | well-preserved; head capsule largely hollow                                                                                                              |
| NMB F3389      | <i>X. resurrecta</i> | female | adult | symmetric  | not preserved | 779                   | pupal skin only; damaged                                                       | generally poorly preserved; head and gaster deformed                                                                                                     |
| NMB F3394      | <i>X. resurrecta</i> | female | adult | asymmetric | not preserved | 934                   | pupal skin only                                                                | generally well-preserved but partly connected to adjacent voids                                                                                          |
| NMB F3477      | <i>X. resurrecta</i> | female | adult | ?          | not preserved | 817                   | puparium largely detached from pupal skin; anterior part missing               | poorly preserved and partly connected to adjacent voids; head missing; gaster deformed                                                                   |
| NMB F3612      | <i>X. resurrecta</i> | female | adult | asymmetric | unfolded      | 847                   | pupal skin only; slightly damaged                                              | generally well-preserved; head, mesopectus, gaster and legs slightly damaged                                                                             |
| NRM-PZ Ar65771 | <i>X. resurrecta</i> | female | adult | symmetric  | folded        | 813                   | complete puparium                                                              | well-preserved; head capsule largely hollow                                                                                                              |
| NRM-PZ Ar65793 | <i>X. resurrecta</i> | female | adult | ?          | not preserved | 895                   | puparium partly detached from pupal skin                                       | generally poorly preserved; petiole barely recognizable; gaster deformed                                                                                 |
| NRM-PZ Ar65913 | <i>X. resurrecta</i> | female | adult | asymmetric | unfolded      | 824                   | puparium slightly damaged and posteriorly detached from pupal skin             | well-preserved; petiole hollow                                                                                                                           |
| NRM-PZ Ar65938 | <i>X. resurrecta</i> | female | adult | asymmetric | not preserved | 938                   | puparium posteriorly detached from pupal skin; pieces of stony matrix attached | poorly preserved and partly connected to adjacent voids                                                                                                  |
| NMB F2557      | <i>X. resurrecta</i> | male   | adult | symmetric  | folded        | 836                   | pupal skin only                                                                | generally well-preserved; head hollow and damaged anteriorly                                                                                             |
| NMB F2674      | <i>X. resurrecta</i> | male   | adult | asymmetric | unfolded      | 857                   | puparium posteriorly detached from pupal skin                                  | generally poorly preserved; legs of host fly partly visible                                                                                              |
| NMB F2732      | <i>X. resurrecta</i> | male   | adult | ?          | not preserved | 835                   | complete puparium                                                              | generally poorly preserved and heavily deformed; petiole distinct                                                                                        |
| NMB F2752      | <i>X. resurrecta</i> | male   | adult | asymmetric | folded        | 765                   | puparium largely detached from pupal skin                                      | generally well-preserved; left profemur deformed; left antenna broken; remnants of flight muscles visible                                                |
| NMB F2831      | <i>X. resurrecta</i> | male   | adult | symmetric  | folded        | 811                   | puparium partly detached from pupal skin                                       | poorly preserved; head and gaster deformed                                                                                                               |
| NMB F2851      | <i>X. resurrecta</i> | male   | adult | symmetric  | folded        | 763                   | puparium anteriorly detached; antenna of parasitoid visible through pupal skin | head barely recognizable; mesonotum well-preserved; mesopectus barely recognizable; petiole well-preserved; gaster deformed                              |
| NMB F2854      | <i>X. resurrecta</i> | male   | adult | ?          | not preserved | 901                   | pupal skin only                                                                | poorly preserved and hardly traceable                                                                                                                    |
| NMB F2945      | <i>X. resurrecta</i> | male   | adult | asymmetric | unfolded      | 943                   | pupal skin only; anteriorly damaged                                            | generally well-preserved; head detached; mesosoma and petiole well-preserved; gaster barely recognizable                                                 |
| NMB F2985      | <i>X. resurrecta</i> | male   | adult | asymmetric | unfolded      | 774                   | pupal skin only                                                                | generally well-preserved; left antenna broken; left metatibia detached                                                                                   |
| NMB F3140      | <i>X. resurrecta</i> | male   | adult | asymmetric | unfolded      | 816                   | complete puparium                                                              | generally well-preserved; head capsule barely recognizable; several antennal segments and left mesofemur detached                                        |
| NMB F3146      | <i>X. resurrecta</i> | male   | adult | symmetric  | folded        | 871                   | complete puparium                                                              | generally poorly preserved and partly connected to adjacent voids; head detached; compound eyes barely recognizable; posterior mesosoma poorly preserved |
| NMB F3254      | <i>X. resurrecta</i> | male   | adult | symmetric  | folded        | 804                   | complete puparium; small piece of stony matrix attached                        | generally well-preserved but partly connected to adjacent voids; compound eyes barely                                                                    |



|                |                       |         |                           |            |               |     |                                                                                       |                                                                                                                                                                   |
|----------------|-----------------------|---------|---------------------------|------------|---------------|-----|---------------------------------------------------------------------------------------|-------------------------------------------------------------------------------------------------------------------------------------------------------------------|
| NMB F3278      | <i>X. resurrecta</i>  | male    | adult                     | asymmetric | unfolded      | 894 | puparium partly damaged; small piece of stony matrix attached                         | recognizable<br>generally well-preserved; several antennal segments detached                                                                                      |
| NMB F3516      | <i>X. resurrecta</i>  | male    | adult                     | ?          | not preserved | n/a | puparium damaged anteriorly and posteriorly; endocast of parasitoid's gaster visible  | generally well-preserved but collapsed into pieces                                                                                                                |
| NMB F3562      | <i>X. resurrecta</i>  | male    | adult                     | symmetric  | folded        | n/a | puparium heavily damaged; anterior part missing                                       | generally poorly preserved; head and anterior mesosoma missing; ventrally damaged                                                                                 |
| NMB F3610      | <i>X. resurrecta</i>  | male    | adult                     | symmetric  | folded        | 761 | puparium partly detached from pupal skin                                              | generally well-preserved; gaster damaged dorsally                                                                                                                 |
| NRM-PZ Ar65720 | <i>X. resurrecta</i>  | male    | adult                     | symmetric  | folded        | 911 | complete puparium; posterior top slightly damaged                                     | well-preserved; head hollow                                                                                                                                       |
| NRM-PZ Ar65767 | <i>X. resurrecta</i>  | male    | adult                     | symmetric  | folded        | 832 | complete puparium                                                                     | generally poorly preserved; head deformed; compound eyes missing; legs and metapetal-propodeal complex hardly recognizable                                        |
| NRM-PZ Ar65772 | <i>X. resurrecta</i>  | male    | adult                     | asymmetric | unfolded      | 777 | puparium partly detached from pupal skin; endocast of the parasitoid's gaster visible | generally well-preserved but partly connected to adjacent voids; antennae and legs partly collapsed                                                               |
| NRM-PZ Ar65794 | <i>X. resurrecta</i>  | male    | adult                     | asymmetric | unfolded      | 871 | puparium damaged                                                                      | poorly preserved and partly connected to adjacent voids; head hollow                                                                                              |
| NRM-PZ Ar65800 | <i>X. resurrecta</i>  | male    | adult                     | symmetric  | folded        | 786 | complete puparium with posteriorly damaged surface                                    | generally well-preserved; head barely recognizable                                                                                                                |
| NRM-PZ Ar65823 | <i>X. resurrecta</i>  | male    | adult                     | asymmetric | unfolded      | 896 | pupal skin only                                                                       | well-preserved; head, mesosoma and petiole hollow                                                                                                                 |
| NRM-PZ Ar65895 | <i>X. resurrecta</i>  | male    | adult                     | symmetric  | folded        | 782 | complete puparium; circular anteroventral damage                                      | generally well-preserved but partly connected to adjacent voids                                                                                                   |
| NRM-PZ Ar65948 | <i>X. resurrecta</i>  | male    | adult                     | asymmetric | not preserved | 856 | pupal skin only                                                                       | generally well-preserved; compound eyes missing; parts of mesosoma barely recognizable; gaster damaged                                                            |
| NMB F3042      | <i>X. handschini</i>  | female  | adult                     | symmetric  | folded        | 734 | pupal skin only; right antenna and procoxae visible                                   | mandibles, dorsal mesosoma and petiole well-preserved; ventral mesosoma barely recognizable; gaster poorly preserved                                              |
| NMB F2543      | <i>X. handschini</i>  | male    | adult                     | symmetric  | folded        | 911 | pupal skin only; left antenna visible                                                 | head and anterior mesosoma well-preserved; posterior mesosoma barely recognizable; petiole and gaster poorly preserved                                            |
| NMB F3192      | <i>X. handschini</i>  | male    | adult                     | ?          | not preserved | n/a | pupal skin only                                                                       | generally poorly preserved and largely connected to adjacent voids; petiole and parts of mesosoma well recognizable; remnants of flight muscles visible           |
| NMB F3571      | <i>X. handschini</i>  | male    | adult                     | asymmetric | unfolded      | 817 | pupal skin only; posterior third missing                                              | generally well-preserved; petiole and gaster hollow; antennae and legs partly deformed; posterior part of gaster missing                                          |
| NRM-PZ Ar65942 | <i>X. handschini</i>  | male    | adult                     | asymmetric | not preserved | n/a | puparium; damaged anteriorly                                                          | generally poorly preserved; only some body parts recognizable (e.g. head capsule, petiole, gaster)                                                                |
| NRM-PZ Ar65822 | <i>X. handschini</i>  | unknown | pupa                      | n/a        | n/a           | n/a | puparium; damaged anteriorly                                                          | poorly preserved and deformed; largely connected to adjacent voids; species identification based on broad petiole                                                 |
| NMB F2848      | <i>C. anka</i>        | female  | adult                     | asymmetric | unfolded      | 794 | pupal skin only                                                                       | head and anterior mesosoma apparently cut off; otherwise well-preserved                                                                                           |
| NMB F2954      | <i>C. anka</i>        | female  | adult                     | symmetric  | folded        | 703 | complete puparium; slightly dented                                                    | head poorly preserved; compound eyes missing; mesosoma and petiole well-preserved, gaster poorly preserved; distal parts of antennae and legs barely recognizable |
| NRM-PZ Ar65897 | <i>C. anka</i>        | female  | adult                     | symmetric  | folded        | 717 | complete puparium; dented; fly legs visible                                           | generally well-preserved; compound eyes missing; distal parts of antennae and legs barely recognizable; legs of host fly partly visible                           |
| NMB F3154      | <i>C. anka</i>        | male    | adult                     | symmetric  | not preserved | 652 | pupal skin only                                                                       | generally well-preserved; compound eyes missing; distal parts of antennae and legs barely recognizable                                                            |
| NMB F2770      | <i>P. quercyensis</i> | female  | adult                     | asymmetric | unfolded      | 810 | complete puparium; dented and slightly damaged                                        | generally well-preserved; only some antennal segments missing                                                                                                     |
| NMB F2631      | unknown               | unknown | putative 2nd instar larva | n/a        | n/a           | n/a | complete puparium                                                                     | preserved as void; fine details like mandibles and hairs missing                                                                                                  |
| NMB F2711      | unknown               | unknown | larval mandibles          | n/a        | n/a           | n/a | pupal skin and minor parts of puparium                                                | only mandibles of last larval instar                                                                                                                              |
