# Supplementary material for: Parasitoid biology preserved in mineralized fossils
Source: PubMed Central journal article supplement (PMC6113268; doi:10.1038/s41467-018-05654-y), 2018-08-28
Supplement: 41467_2018_5654_MOESM6_ESM.pdf [file 41467_2018_5654_MOESM6_ESM.pdf]

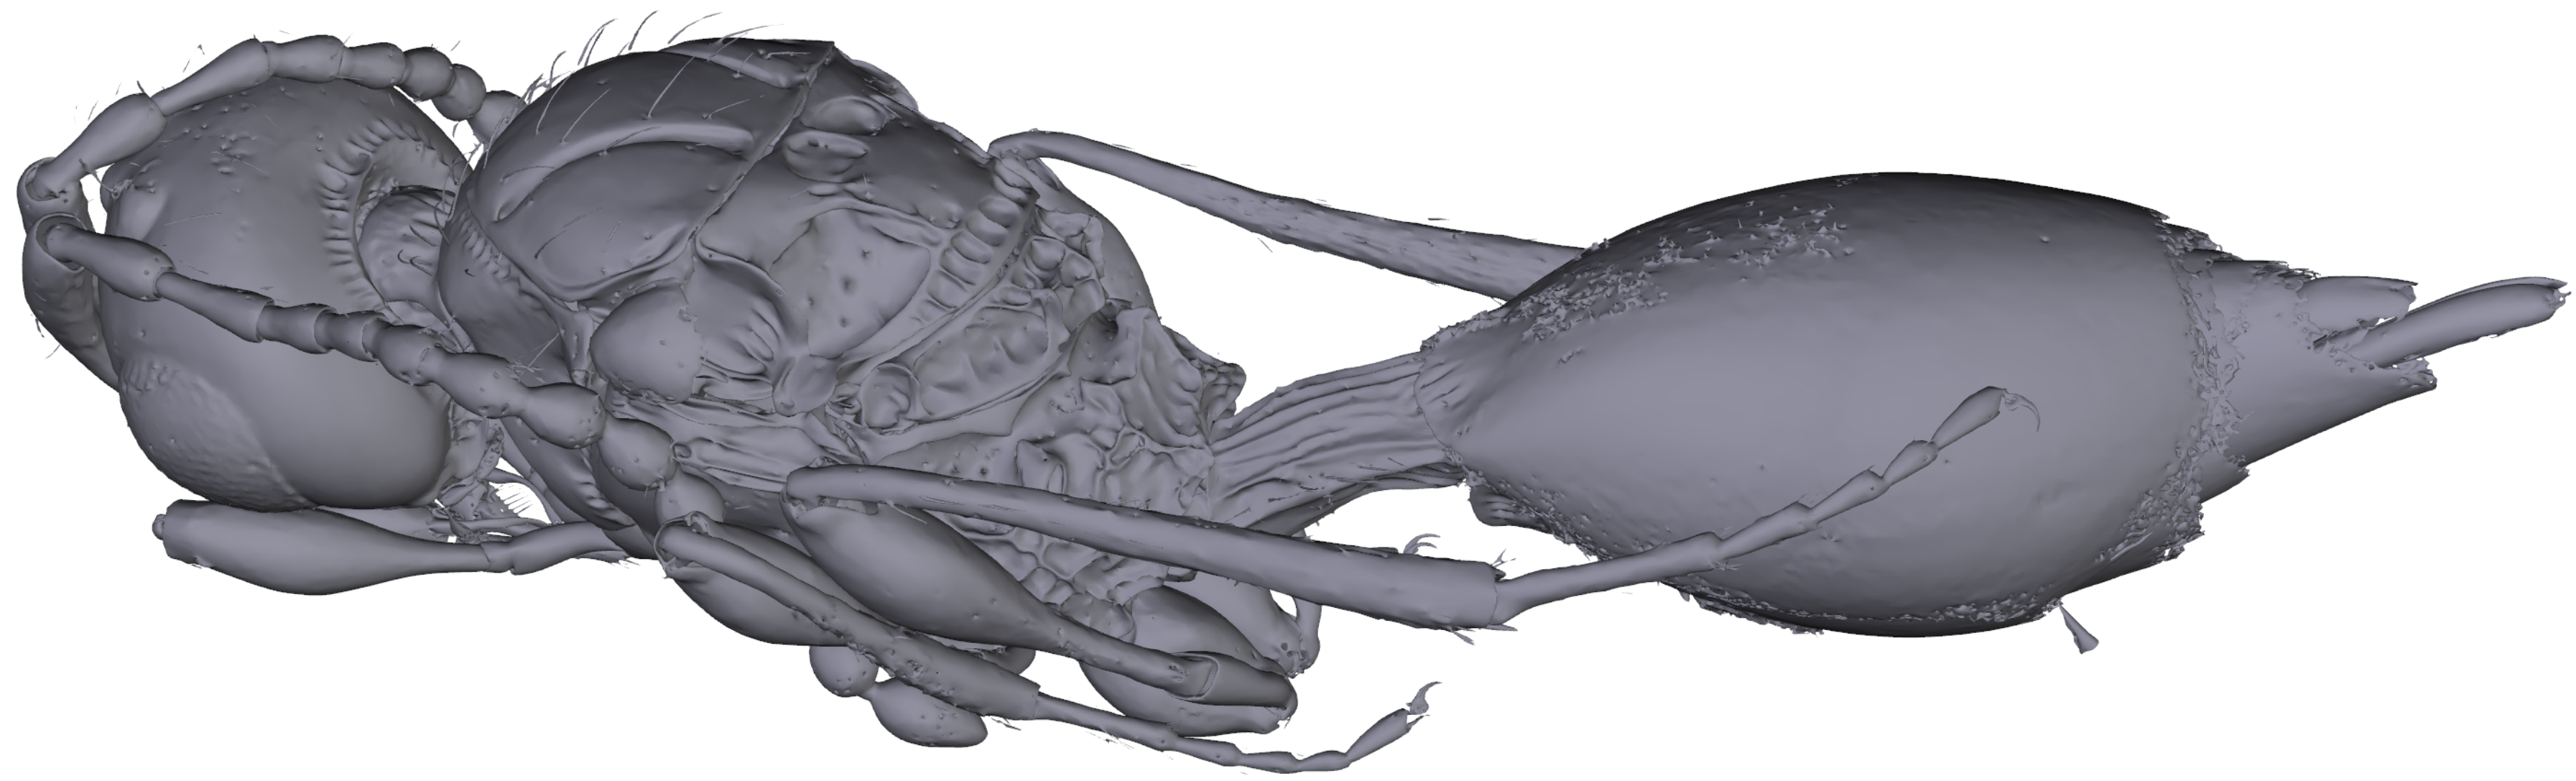

1 mm
